# Supplementary material for: Perfusion Parameters in Near-Infrared Fluorescence Imaging with Indocyanine Green: A Systematic Review of the Literature
Source: MDPI journal article supplement (doi:10.3390/life11050433), 2021-05-11

**Table S1.** Quality assessment and risk of bias according to the revised Quality Assessment of Diagnostic Accuracy Studies

| Study                 | Risk of Bias      |            |                    | Applicability Concerns |                   |            |                    |
|-----------------------|-------------------|------------|--------------------|------------------------|-------------------|------------|--------------------|
|                       | Patient Selection | Index test | Reference Standard | Flow and Timing        | Patient Selection | Index test | Reference Standard |
| Abdelwahab, 2019(6)   | -                 | +          | ?                  | -                      | -                 | -          | -                  |
| Abdelwahab, 2019(7)   | +                 | +          | ?                  | -                      | -                 | -          | -                  |
| Aiba, 2021(8)         | -                 | +          | ?                  | -                      | -                 | -          | -                  |
| Amagai, 2020(9)       | -                 | +          | -                  | -                      | -                 | -          | -                  |
| Betz, 2009(10)        | -                 | +          | -                  | -                      | -                 | -          | -                  |
| Betz, 2013(11)        | -                 | +          | -                  | -                      | -                 | -          | -                  |
| Braun, 2013(12)       | -                 | +          | -                  | -                      | -                 | -          | -                  |
| Colvard, 2016(13)     | -                 | +          | -                  | -                      | -                 | -          | -                  |
| D'urso, 2020(14)      | -                 | +          | -                  | -                      | -                 | -          | -                  |
| Fichter, 2019(15)     | -                 | +          | ?                  | -                      | -                 | -          | -                  |
| Gerken, 2020(16)      | -                 | +          | -                  | -                      | -                 | -          | -                  |
| Girard, 2019(17)      | -                 | +          | -                  | -                      | -                 | -          | -                  |
| Goertz, 2019(18)      | -                 | +          | ?                  | -                      | -                 | -          | -                  |
| Gorai, 2017(19)       | -                 | +          | -                  | -                      | -                 | -          | -                  |
| Hajhosseini, 2021(20) | -                 | +          | ?                  | +                      | -                 | -          | -                  |
| Han, 2018(21)         | -                 | +          | -                  | -                      | -                 | -          | -                  |
| Hayami, 2019(22)      | -                 | +          | -                  | -                      | -                 | -          | -                  |
| Hitier, 2016(23)      | -                 | +          | -                  | -                      | -                 | -          | -                  |
| Holling, 2013(24)     | -                 | +          | -                  | -                      | -                 | -          | -                  |
| Igari, 2013(25)       | -                 | +          | -                  | -                      | -                 | -          | -                  |
| Igari, 2014(26)       | +                 | +          | -                  | -                      | +                 | -          | -                  |
| Ishige, 2019(27)      | -                 | +          | ?                  | -                      | -                 | ?          | -                  |
| Kamiya, 2015(28)      | -                 | +          | -                  | -                      | -                 | -          | -                  |
| Kamp, 2017(29)        | -                 | +          | -                  | -                      | -                 | -          | -                  |

|                      |   |   |   |   |   |   |   |
|----------------------|---|---|---|---|---|---|---|
| Kamp, 2012(30)       | - | ? | - | - | - | ? | - |
| Kang, 2011(31)       | + | + | - | - | ? | - | - |
| Kang 2010(32)        | + | + | - | - | ? | - | - |
| Kobayashi, 2014(33)  | - | + | - | - | - | - | - |
| Lang, 2017(34)       | - | + | - | - | - | - | - |
| Maxwell, 2016(35)    | + | + | - | - | ? | - | - |
| Mironov, 2019(36)    | - | - | - | - | - | - | - |
| Miyazaki, 2017(37)   | - | + | - | - | - | - | - |
| Mothes, 2009(38)     | - | + | - | - | - | - | - |
| Nakamura, 2017(39)   | - | + | - | - | - | - | - |
| Nishizawa, 2017(40)  | - | + | - | - | - | - | - |
| Patel, 2018(41)      | - | + | - | - | - | - | - |
| Prinz, 2014(42)      | - | + | ? | - | - | - | - |
| Regus, 2019(43)      | - | + | - | - | - | - | - |
| Rennert, 2018(44)    | - | + | - | - | - | - | - |
| Rennert, 2019(45)    | - | + | - | - | - | - | - |
| Rother, 2019(46)     | - | + | - | - | - | - | - |
| Rother, 2018(47)     | - | + | - | - | - | - | - |
| Rother, 2017(48)     | - | + | - | - | - | - | - |
| Rother, 2020(49)     | ? | + | - | - | - | - | - |
| Schneider, 2011(50)  | ? | + | - | - | ? | - | - |
| Seinturier, 2020(51) | - | + | - | ? | - | - | - |
| Settembre, 2017(52)  | - | + | - | - | - | - | - |
| Shi, 2015(53)        | - | + | - | - | - | - | - |
| Son, 2019(54)        | - | + | - | - | - | - | - |
| Tanaka, 2015(55)     | - | + | - | - | - | - | - |

|                      |   |   |   |   |   |   |   |
|----------------------|---|---|---|---|---|---|---|
| Terasaki, 2013(56)   | - | + | - | - | - | - | - |
| Uchino, 2014(57)     | - | + | - | - | - | - | - |
| Uchino, 2013(58)     | - | + | - | - | - | - | - |
| Venermo, 2016(59)    | - | + | - | - | - | - | - |
| Wada, 2017(60)       | - | - | - | - | - | - | - |
| Woitzik, 2006(61)    | ? | + | ? | - | ? | ? | - |
| Yang, 2018(62)       | - | + | - | - | - | - | - |
| Ye, 2013(63)         | - | + | - | - | - | - | - |
| Zhang, 2020(64)      | - | + | - | - | - | - | - |
| Zimmermann, 2012(65) | - | + | - | - | - | - | - |

-, Low risk of bias; + high risk of bias; ? risk of bias unclear

**Figure S1.** Proportion of studies with low, high, and unclear risk of bias according to the revised Quality Assessment of Diagnostic Accuracy Studies.

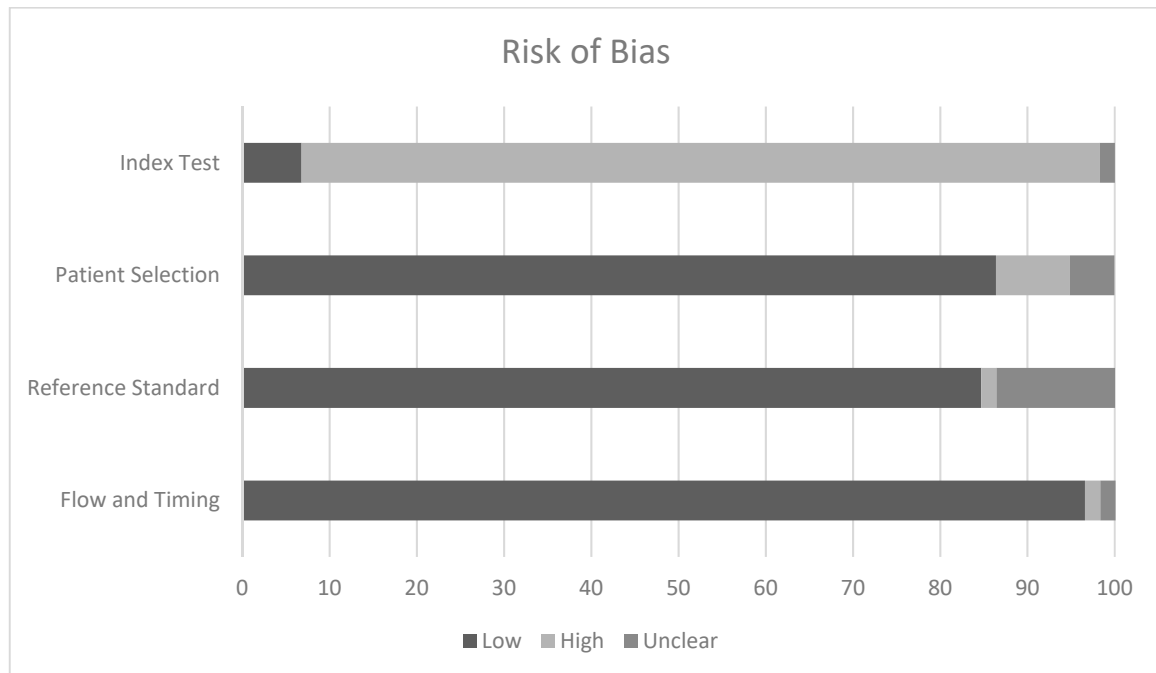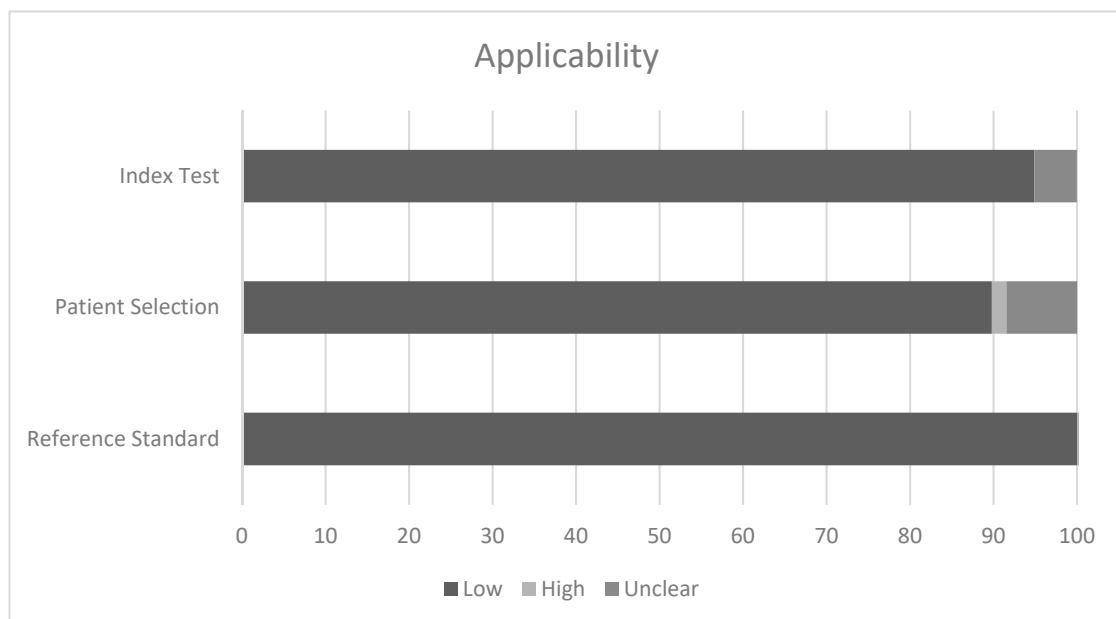

Supplement: s1 [file s1]
